# Supplementary material
Source: Research Square preprint supplement (doi:10.21203/rs.3.rs-10300384/v1)
Supplement: Supplementary file 1 [file 97cce1d32ca216137a67d387.docx]

Supplementary Materials：

Nanofluidic memristor with an ultra-low operating voltage

Yike Xiao1,2†, Yukun Bao1†, Tianyong Peng1, Kangrui Li1, Pingyuan Yan1, Wei Huang2, Chuanxiang Sheng3, Qi Wang1 and Ye Feng Yu1*

1School of Microelectronics, Nanjing University of Science and Technology, Nanjing, 210094, China.

2China Key Laboratory of Multifunctional Nanomaterials and Smart Systems, Suzhou Institute of Nano-Tech and Nano-Bionics (SINANO), Chinese Academy of Sciences, Suzhou, 215123, China.

3Department of Optical Science and Engineering, School of Information Science and Technology, Fudan University, Shanghai, 200433, China.

*Corresponding author. Email: [yf_yu@njust.edu.cn](mailto:yf_yu@njust.edu.cn)

†These authors contributed equally to this work.

The PDF file includes:

Supplementary Text

Figs. S1 to S9

Tables S1 to S3

References (32, 35, 48, 55, 63-70)

**Supplementary Text**

Note S1. Derivation of *N*1

For atruncated conical nanochannel (fig. S9c), the surface area *S*i is calculated by:

|  |  | (s1) |
| --- | --- | --- |

Where *h*, *D*, *d,* and *θ* represent the height, top radius, bottom radius, and half-cone angle of the truncated conic.

*S*ssa is the specific surface area of the PAF (the surface area other than nanochannels can be neglected), calculated by:

|  |  | (s2) |
| --- | --- | --- |

Where *S*p is the surface area of a nanochannel, *N*n is the total number of nanochannels in the PAF, and *m* is the mass of the PAF.

*S*p is calculated by:

|  |  | (s3) |
| --- | --- | --- |

Where *l* is the length of the nanochannel.

*N*n is calculated by:

|  |  | (s4) |
| --- | --- | --- |

Where *R*p is the radius of the PAF, and *s* is the average pore spacing of the nanopores.

Given the assumptions that *h* = 14.28 nm, *D* = 36 nm, *d* = 22 nm, *θ* = 24.83°, m = 50 mg, *l* = 55 μm, *R*p = 12.5 mm, *s* = 60 nm and *A*p = 1 × 10−6 mol/g to 1 × 10−5 mol/g(*64*), *N*1 is calculated to be 41 to 411.

Note S2. Derivation of *N*2

For atruncated conical nanochannel (fig. S9c), the volume *V*i is calculated by

|  |  | (s5) |
| --- | --- | --- |

Where *h*, *D*, *d,* and *θ* represent the height, top radius and bottom radius of the truncated conic. *α*[Cu2+] is the activity of Cu2+ ion, see table S1. Given the assumptions that *h* = 14.28 nm, *D* = 36 nm, and *d* = 22 nm, *N*2 is calculated to be 199 in 1 M CuSO4.

Note S3. Theoretical interpretation of nonzero short-circuit current (*I*sc)

In the *I-V* characteristics of CNM, the current at the origin often exhibits a nonzero positive value. This behavior can be attributed to electrochemical reactions occurring within the CNM during voltage scanning. Specifically, the following reduction reactions may take place at the cathode:

|  |  | (s6) |
| --- | --- | --- |
|  |  | (s7) |
|  |  | (s8) |

Reactions s6 and s7 involve the reduction of Cu²⁺ or Cu₂O to metallic Cu. Reaction s8 corresponds to the reduction of Cu²⁺ to Cu₂O. At the anode, the following oxidation reactions may occur:

|  |  | (s9) |
| --- | --- | --- |
|  |  | (s10) |
|  |  | (s11) |

Reactions s9 and s10 represent the oxidation of metallic Cu to Cu²⁺ or Cu₂O. Reaction s11 describes the further oxidation of Cu₂O to Cu²⁺. The equilibrium electrode potentials for the above reactions can be determined using the Nernst equation:

|  |  | (s12) |
| --- | --- | --- |

Each equilibrium electrode potential for the cathode reactions at various CuSO₄ concentrations are summarized in table S2. Since the anode reactions are the reverse of their cathode counterparts, their equilibrium potentials are equal in magnitude but opposite in sign. Under ideal conditions, the overall electromotive force (*E*cell) of the system can be expressed as:

|  |  | (s13) |
| --- | --- | --- |

*E*cell greater than zero indicates that the corresponding reactions can proceed spontaneously. A positive *E*cell resulting from the coupling of cathodic reaction s6 and anodic reaction s10 — indicating a spontaneous electrochemical process within the CNM — accounts for the nonzero *I*sc.

Note S4. Interaction between copper ions and the PAF nanochannels

In 1 M CuSO4 solution, PAF exhibits a weak positive zeta potential (~5 mV) (fig. S2k and l). Consequently, the interaction between copper ions and PAF is dominated primarily by chemical adsorption. Upon immersion in aqueous solutions, the PAF undergoes rapid surface hydroxylation, leading to the formation of surface hydroxyl groups [Al-OH]. These hydroxyl groups can stably coordinate with copper ions to form surface complexes, such as(*55*):

|  |  | (s14) |
| --- | --- | --- |
|  |  | (s15) |

X-ray photoelectron spectroscopy (XPS) is employed to verify the copper ion adsorption capacity of PAF: the PAF is first extracted from CNM, then repeatedly rinsed and soaked in deionized water to remove residual electrolytes. The XPS spectra reveal a distinct copper signal on the PAF (fig. S7a)(*65*).

Furthermore, to confirm that the memristive effect originates from the interaction between PAF nanochannels and Cu²⁺, we performed a control experiment using a sulfate-based electrolyte free of Cu²⁺ ions by measuring the *I-V* characteristics in a 1 M Na2SO₄ aqueous solution. The *I*-*V* curve exhibits a purely linear ohmic response, with forward and backward scan curves forming a clockwise loop resembling a capacitance curve (fig. S7b). Notably, a control device with a corundum film, which we consider a PAF without functional nanochannels, exhibits no memristive behavior (fig. S7c). These results collectively attribute the observed memristive behavior to the interaction between copper ions and the PAF nanochannels.

**
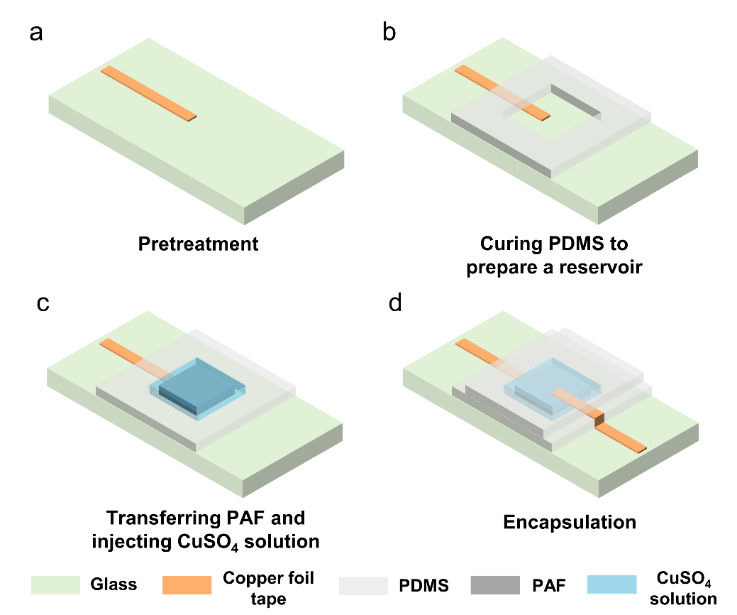
**

**Fig. S1:** **Detailed fabrication process of CNM.** (**a**) Pretreatment. (**b**) Curing PDMS to prepare a reservoir. (**c**) Transferring PAF and injecting CuSO4 solution. (**d**) Encapsulation.

**
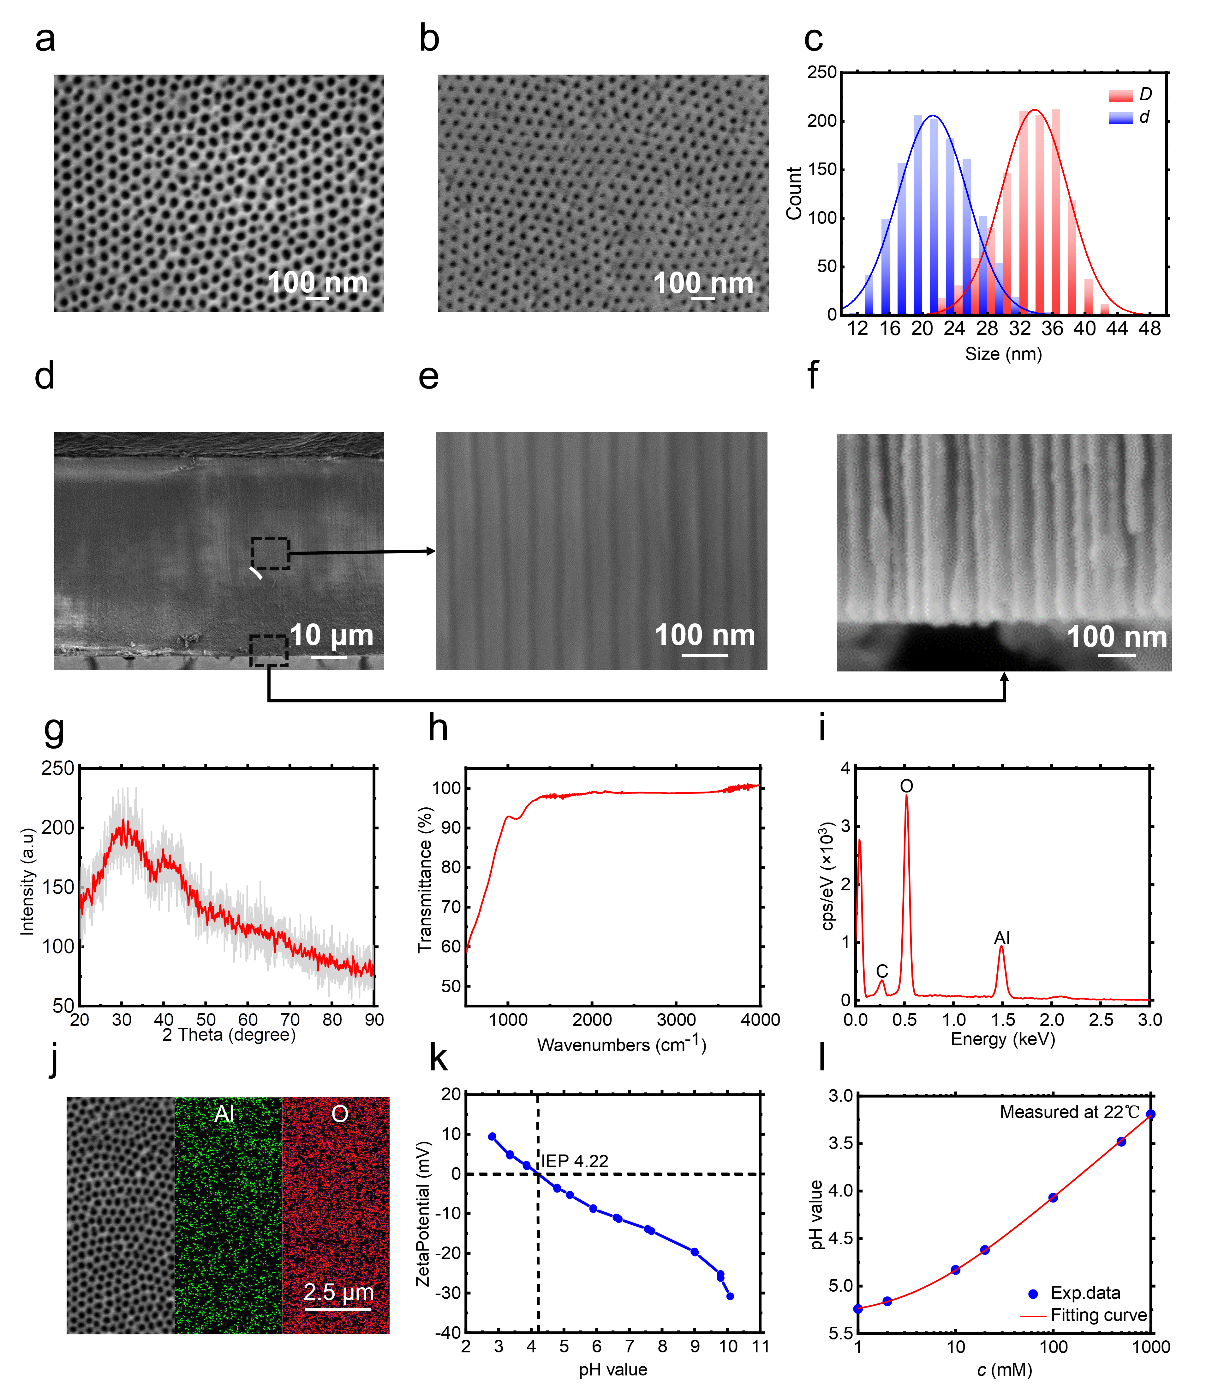
**

**Fig. S2: Characterizations of PAF.** SEM images of PAF’s (**a**) top and (**b**) bottom surfaces, with scale bars of 100 nm. (**c**) Distributions of pore diameters on the top surface (*D*) and bottom surface (*d*). (**d**) and (**e**) Cross-sectional SEM images of PAF, with scale bars of 10 μm and 100 nm, respectively. (**f**) Cross-sectional SEM image of the bottom surface, with a scale bar of 100 nm. (**g**) XRD spectrum of PAF, showing a broad peak around 30°. (**h**) FTIR spectrum of PAF, with no significant absorption peak. (**i**) EDS spectrum of PAF. (**j**) SEM image of PAF and corresponding elemental EDS maps of aluminum and oxygen elements, with scale bars of 2.5 μm. (**k**) Zeta potential graph of PAF, with the isoelectric point (IEP) of ~4.22. (**l**) Plot of the concentrations and pH values of the CuSO4 solutions.


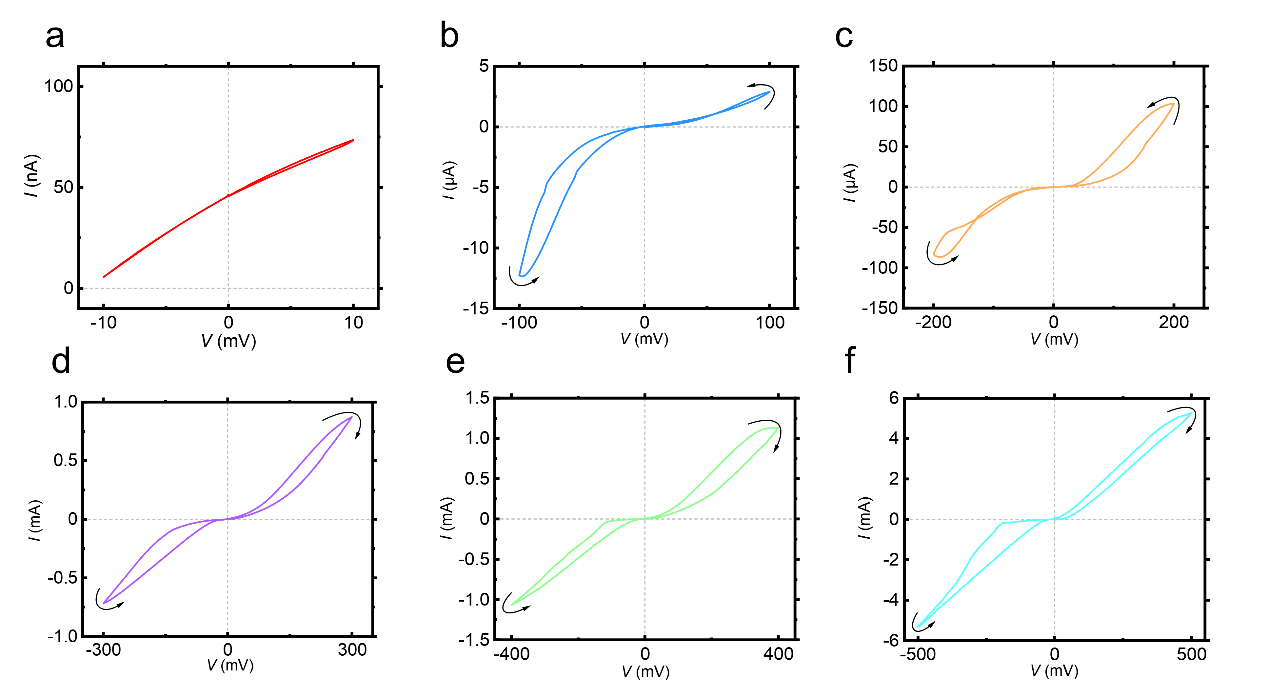


**Fig. S3: *I-V* curves of CNM.** (**a**) *I-V* curves of CNM in 1 M CuSO4 aqueous solution under a DC scan with a scan rate of 0.2 mV/step. (**b-f**) *I-V* curves of CNM under DC scans with the voltage range set from 100 mV to 500 mV in 100 mV increments. The scan rate is set as 2 mV/step. The arrows indicate the scan direction. Notably, the ICR effect vanishes when the voltage exceeds 100 mV; however, CNM continues to exhibit memristive behavior. This behavior is independent of ion adsorption and desorption, and is instead attributed to changes in the overpotential *E*o. Specifically, *E*o is lower during positive voltage scanning compared to negative voltage scanning.

**
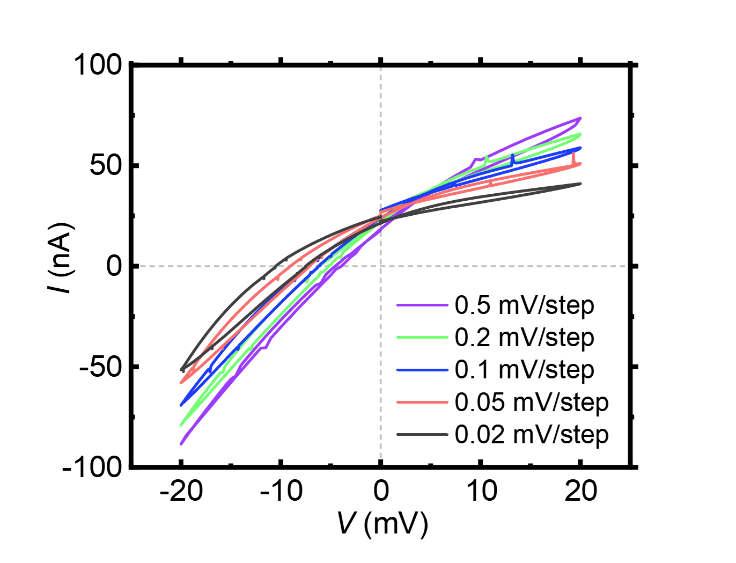
**

**Fig. S4: *I–V* curves of the CNM measured at different sweep rates.**

**
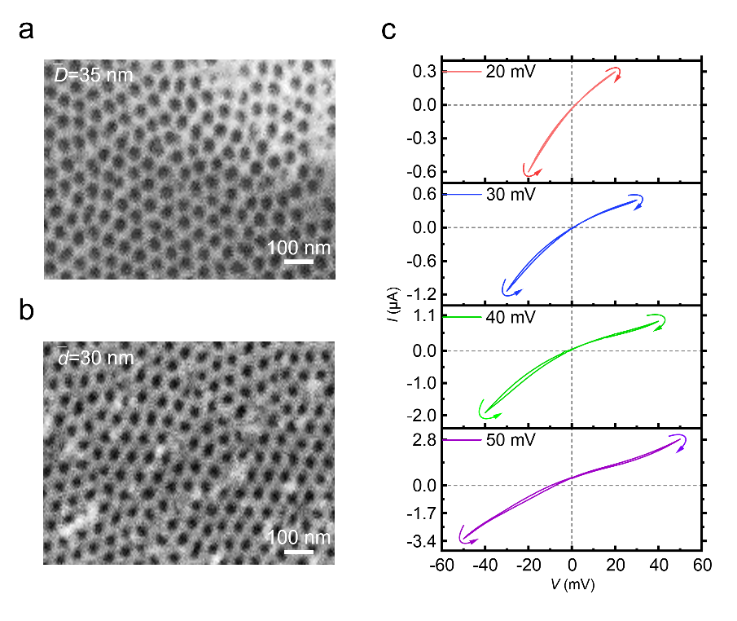
**

**Fig. S5: Device with symmetric PAF.** SEM images of the symmetric PAF’s (**a**) top and (**b**) bottom surfaces, with scale bars of 100 nm. Average pore diameters on the top surface (*D*) and bottom surface (*d*)are 35 nm and 30 nm, respectively. (**c**) *I*-*V* curves of the device with symmetric PAF. The voltage range is set from 20 mV to 50 mV (10 mV increments) and the scan rate is set as 0.5 mV/step. The arrows indicate the scan direction.

**
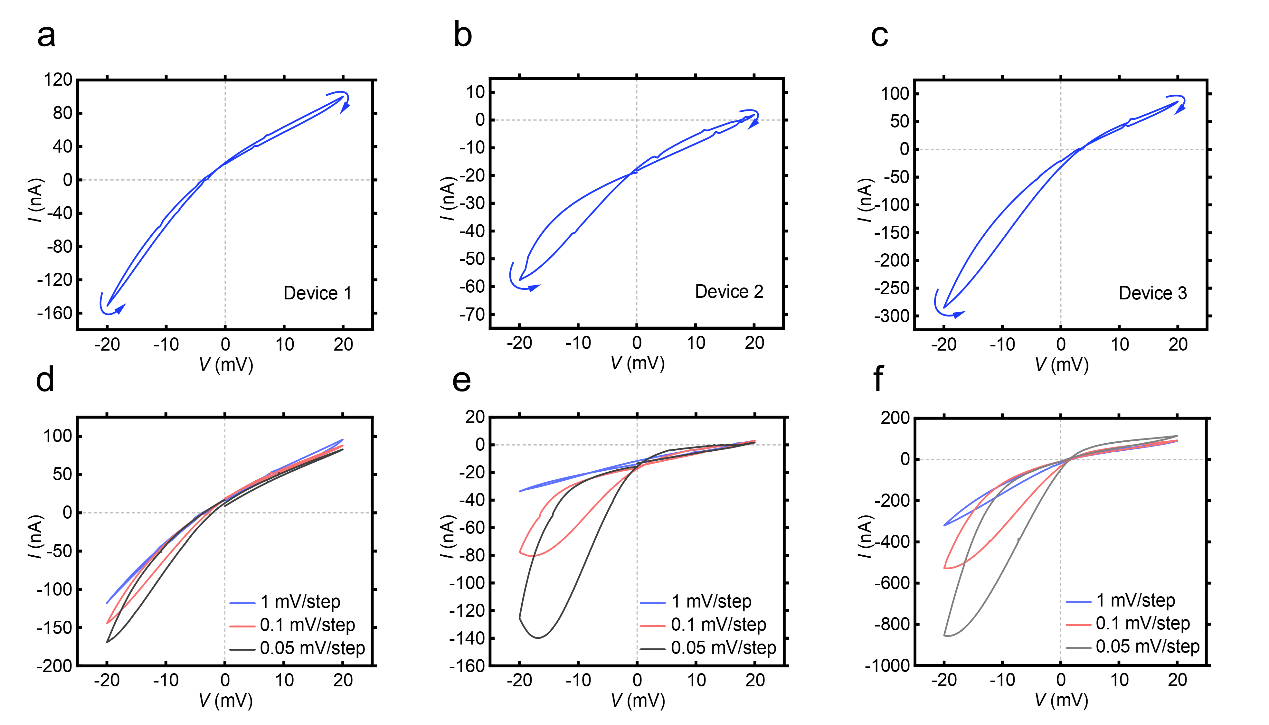
**

**Fig. S6: Device-to-device variability of CNM.** (**a-c**) *I*-*V* curves of devices 1-3 in 1 M CuSO4 aqueous solution under a DC scan with a scan rate of 0.5 mV/step. The arrows indicate the scan direction. (**d-f**) *I*-*V* curves of devices 1-3 in 1 M CuSO4 under DC scans with different scan rates (1, 0.1, and 0.05 mV/step). All devices consistently exhibit bipolar memristive behaviors, despite variations in ionic current magnitudes and hysteresis loop areas. These discrepancies likely originate from the variations in the quantity and pore diameter of activated nanochannels within PAFs.

**
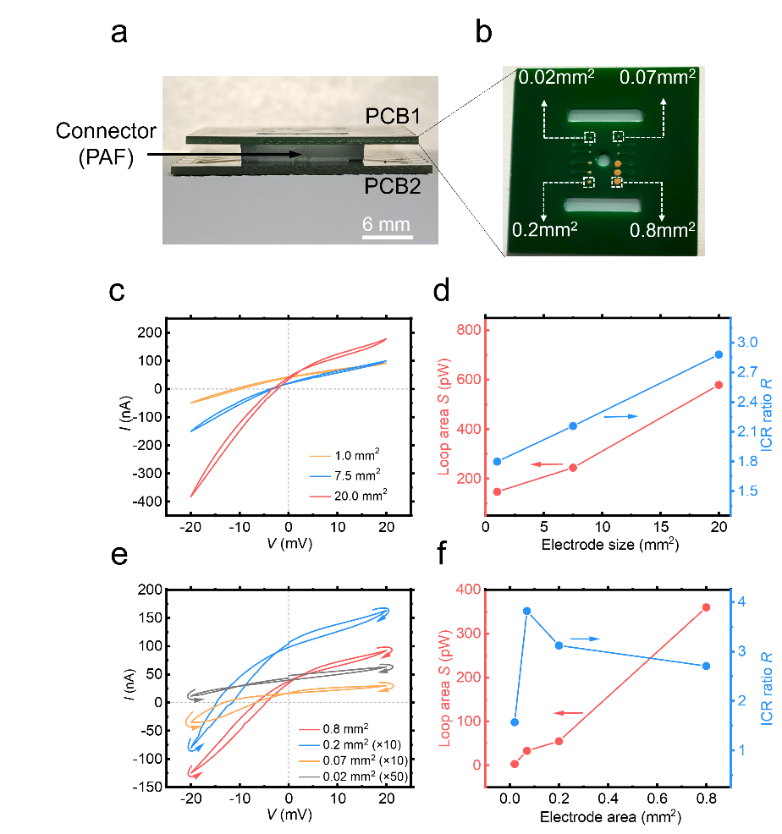
**

**Fig. S7: Scalability of CNM.** (**a**) Image of CNM, which consists of PCBs (printed circuit boards), connectors, PAF, and CuSO4 solution. PCBs and connectors function as a reservoir, within which PAF and CuSO4 solution are contained. (**b**) Top view of CNM, copper wires of different sizes (0.02, 0.07, 0.2, 0.8 mm2) on PCBs are served as electrodes. (**c**) *I*-*V* curves of CNM in 1 M CuSO4 aqueous solution under a DC scan with different electrode (copper foil tape) size (1, 7.5, and 20 mm2). The scan rate is set as 0.5 mV/step. (**d**) Plot of the electrode (copper foil tape) size with hysteresis loop area (*S*) and ICR ratio (*R*). (**e**) *I*-*V* curves of CNM in 1 M CuSO4 aqueous solution under a DC scan with different electrode (copper wire) size. (**f**) Plot of the electrode (copper wire) size with hysteresis loop area (*S*) and ICR ratio (*R*).

**
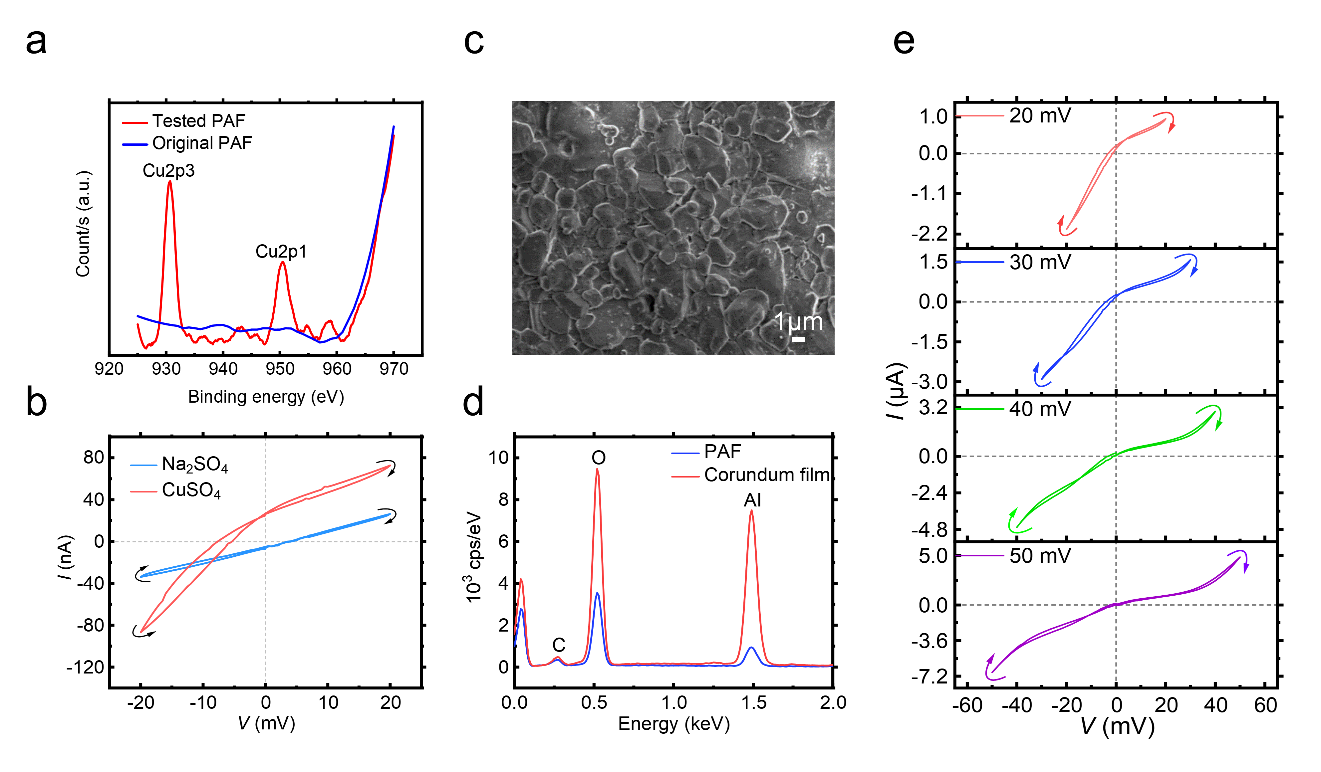
**

**Fig. S8: Interaction between Cu2+ and PAF nanochannels.** (**a**) XPS spectra of the pristine and tested PAF. (**b**) *I-V* curves of the devices using 1 M CuSO4 or Na2SO₄ solutions, and the *I-V* curve of device employing 1 M Na2SO₄ is more capacitive-like.(**c**) SEM image of corundum film**,** with a scale bar of 1 μm. (**d**) EDS spectrum of PAF and corundum film. (**e**) *I*-*V* curves of the device with corundum film. The voltage range is set from 20 mV to 50 mV (10 mV increments) and the scan rate is set as 0.5 mV/step. The arrows indicate the scan direction.


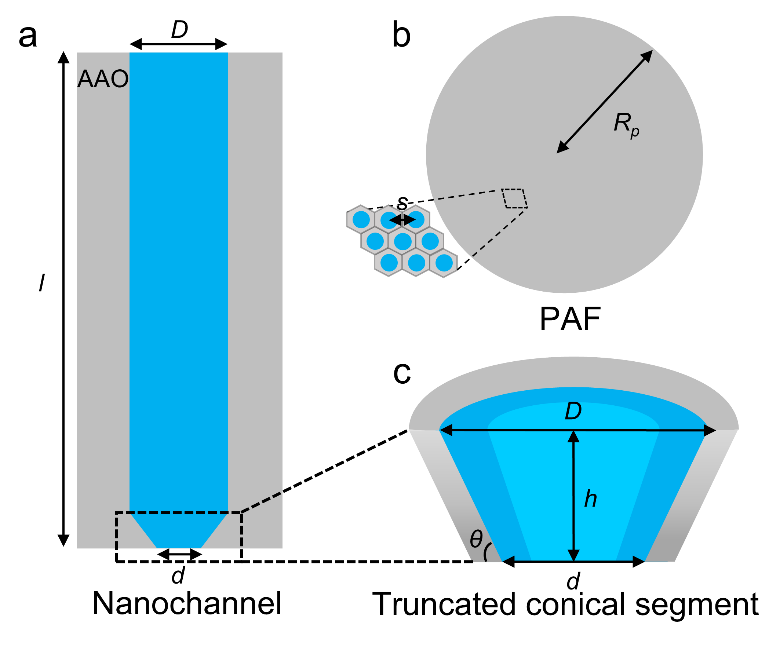
F**ig. S9:** (**a**) Sectional view of one nanochannel in the PAF. (**b**) Vertical view of PAF. (**c**) Sectional view of the truncated conical nanochannel, which is modeled as a circular cone.

**Table S1:** Relationship between the concentration *c* of CuSO4 solution with mean activity coefficient γ± and activity *α*[Cu2+](*66-68*)

| *c* (mM) | γ± | *α*[Cu2+] (mM) |
| --- | --- | --- |
| 1000 | 0.040 | 40.38 |
| 100 | 0.150 | 14.95 |
| 10 | 0.485 | 4.85 |
| 1 | 0.763 | 0.76 |

**Table S2:** Equilibrium electrode potentials of cathodic reactions at various CuSO4 concentrations

| *c* (mM) | pH | s6 (V) | s7 (V) | s8 (V) |
| --- | --- | --- | --- | --- |
| 1000 | 3.19 | 0.299 | 0.273 | 0.309 |
| 100 | 4.07 | 0.286 | 0.221 | 0.33 |
| 10 | 4.83 | 0.271 | 0.176 | 0.351 |
| 1 | 5.23 | 0.248 | 0.152 | 0.328 |

**Table S3****:** Comparison of the CNM with others.

| Reference | Operating Current (nA) | Operating Voltage (V) | Energy Consumption (fJ/pluse) | Neuromorphic Function |
| --- | --- | --- | --- | --- |
| Ref(*32*) | | ~65 | 0.15 | ~105 | STP |
| Ref(*35*) | | ~8 | 20 | ~3.5 × 107 | STP, LTP |
| Ref(*48*) | | ~25 | 1 | ~4 × 107 | STP, LTP, SDTP |
| Ref(*69*) | | ~120 | 1 | ~1.6 × 108 | Boolean logic operation |
| Ref(*23*) | | ~45 | 1 | / | / |
| Ref(*63*) | | ~200 | 1 | ~5 × 106 | STP, Chemical-electric signal transduction |
| Ref(*70*) | | ~15 | 1 | ~6 × 103 | STP、Logic operation |
| **Our work** | | ~700 | 0.015 | ~100 | STP |
